# Supplementary material for: Transcriptomic and biochemical investigations support the role of rootstock-scion interaction in grapevine berry quality
Source: PubMed Central journal article supplement (PMC7341580; doi:10.1186/s12864-020-06795-5), 2020-07-08

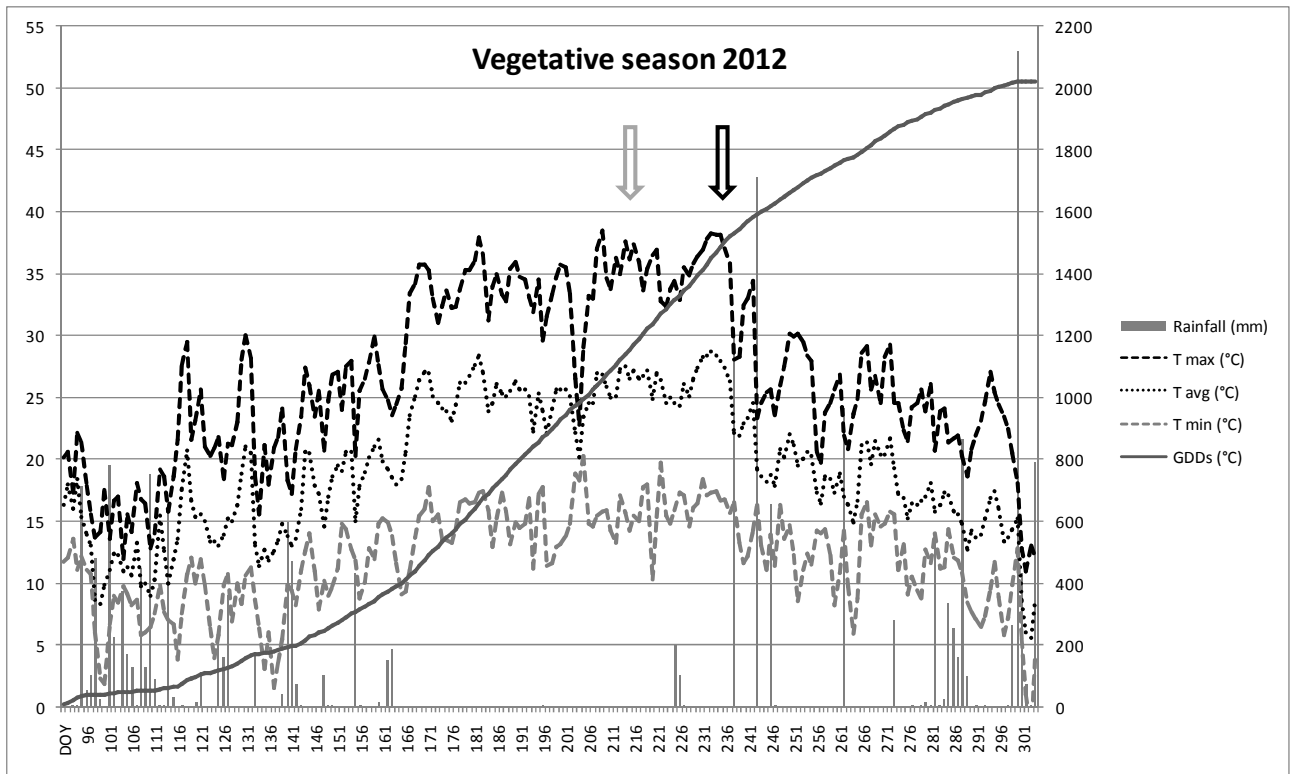

Supplement: 12864_2020_6795_MOESM1_ESM.pdf [file 12864_2020_6795_MOESM1_ESM.pdf]
